# Supplementary material for: Comparative Safety of Originator and Biosimilar Epoetin Alfa Drugs: An Observational Prospective Multicenter Study
Source: Springer Nature journal article supplement (doi:10.1007/s40259-018-0293-2), 2018-07-20
Supplement: MOESM1 [file 24111138]

**Journal Title:** *BioDrugs*

**Article Title:** Adverse events in hemodialysis patients treated with originator or biosimilar epoetins alfa: an observational prospective multicenter study

**Authors:** Giovanna Stoppa, Carmen D'Amore, Anita Conforti, Giuseppe Traversa, Mauro Venegoni, Maurizio Tagliatela, Roberto Leone, on behalf of the ESAVIEW Study Group

**Corresponding Author:**

Roberto Leone

Pharmacology Unit, Department of Diagnostics and Public Health, University of Verona, Verona, Italy; e-mail: roberto.leone@univr.it

**Online Resource 1.** List of MedDRA Preferred Term (PT) codes used to define comorbidities at baseline.

| PT code  | Comorbidities                             | Group     |
|----------|-------------------------------------------|-----------|
| 10044644 | Trifascicular block                       | Arrythmia |
| 10040741 | Sinus bradycardia                         | Arrythmia |
| 10047818 | Wandering pacemaker                       | Arrythmia |
| 10047302 | Ventricular tachycardia                   | Arrythmia |
| 10047294 | Ventricular flutter                       | Arrythmia |
| 10047290 | Ventricular fibrillation                  | Arrythmia |
| 10047289 | Ventricular extrasystoles                 | Arrythmia |
| 10049003 | Accelerated idioventricular rhythm        | Arrythmia |
| 10047281 | Ventricular arrhythmia                    | Arrythmia |
| 10049447 | Tachyarrhythmia                           | Arrythmia |
| 10044066 | Torsade de pointes                        | Arrythmia |
| 10043079 | Tachycardia paroxysmal                    | Arrythmia |
| 10043074 | Tachycardia foetal                        | Arrythmia |
| 10043071 | Tachycardia                               | Arrythmia |
| 10042604 | Supraventricular tachycardia              | Arrythmia |
| 10042602 | Supraventricular extrasystoles            | Arrythmia |
| 10063080 | Postural orthostatic tachycardia syndrome | Arrythmia |
| 10047284 | Ventricular asystole                      | Arrythmia |

| <b>PT code</b> | <b>Comorbidities</b>                 | <b>Group</b> |
|----------------|--------------------------------------|--------------|
| 10057393       | Bifascicular block                   | Arrythmia    |
| 10061592       | Cardiac fibrillation                 | Arrythmia    |
| 10061158       | Foetal heart rate disorder           | Arrythmia    |
| 10059027       | Brugada syndrome                     | Arrythmia    |
| 10058184       | Ventricular parasystole              | Arrythmia    |
| 10058177       | Hyperkinetic heart syndrome          | Arrythmia    |
| 10058156       | Reperfusion arrhythmia               | Arrythmia    |
| 10047997       | Withdrawal arrhythmia                | Arrythmia    |
| 10058151       | Pulseless electrical activity        | Arrythmia    |
| 10040739       | Sinus arrhythmia                     | Arrythmia    |
| 10056471       | Bradycardia neonatal                 | Arrythmia    |
| 10054015       | Agonal rhythm                        | Arrythmia    |
| 10052840       | Cardiac flutter                      | Arrythmia    |
| 10050106       | Paroxysmal arrhythmia                | Arrythmia    |
| 10049775       | Neonatal tachycardia                 | Arrythmia    |
| 10049765       | Bradyarrhythmia                      | Arrythmia    |
| 10049761       | Ventricular pre-excitation           | Arrythmia    |
| 10058155       | Heart alternation                    | Arrythmia    |
| 10003668       | Atrial tachycardia                   | Arrythmia    |
| 10040752       | Sinus tachycardia                    | Arrythmia    |
| 10006578       | Bundle branch block                  | Arrythmia    |
| 10006094       | Bradycardia foetal                   | Arrythmia    |
| 10006093       | Bradycardia                          | Arrythmia    |
| 10003677       | Atrioventricular block second degree | Arrythmia    |
| 10003674       | Atrioventricular block first degree  | Arrythmia    |
| 10006580       | Bundle branch block left             | Arrythmia    |
| 10003671       | Atrioventricular block               | Arrythmia    |
| 10006582       | Bundle branch block right            | Arrythmia    |

| <b>PT code</b> | <b>Comorbidities</b>                  | <b>Group</b> |
|----------------|---------------------------------------|--------------|
| 10003662       | Atrial flutter                        | Arrythmia    |
| 10003658       | Atrial fibrillation                   | Arrythmia    |
| 10003130       | Arrhythmia supraventricular           | Arrythmia    |
| 10003124       | Arrhythmia neonatal                   | Arrythmia    |
| 10003119       | Arrhythmia                            | Arrythmia    |
| 10002611       | Anomalous atrioventricular excitation | Arrythmia    |
| 10001115       | Adams-Stokes syndrome                 | Arrythmia    |
| 10003673       | Atrioventricular block complete       | Arrythmia    |
| 10016847       | Foetal arrhythmia                     | Arrythmia    |
| 10040738       | Sinus arrest                          | Arrythmia    |
| 10040736       | Sinoatrial block                      | Arrythmia    |
| 10039111       | Rhythm idioventricular                | Arrythmia    |
| 10033929       | Parasystole                           | Arrythmia    |
| 10033557       | Palpitations                          | Arrythmia    |
| 10029470       | Nodal rhythm                          | Arrythmia    |
| 10006579       | Bundle branch block bilateral         | Arrythmia    |
| 10024803       | Long QT syndrome                      | Arrythmia    |
| 10048015       | Wolff-Parkinson-White syndrome        | Arrythmia    |
| 10015856       | Extrasystoles                         | Arrythmia    |
| 10012118       | Defect conduction intraventricular    | Arrythmia    |
| 10010276       | Conduction disorder                   | Arrythmia    |
| 10007618       | Cardio-respiratory arrest neonatal    | Arrythmia    |
| 10007617       | Cardio-respiratory arrest             | Arrythmia    |
| 10007516       | Cardiac arrest neonatal               | Arrythmia    |
| 10007515       | Cardiac arrest                        | Arrythmia    |
| 10029458       | Nodal arrhythmia                      | Arrythmia    |
| 10071666       | Atrial parasystole                    | Arrythmia    |
| 10067207       | Rebound tachycardia                   | Arrythmia    |

| <b>PT code</b> | <b>Comorbidities</b>                            | <b>Group</b>  |
|----------------|-------------------------------------------------|---------------|
| 10067618       | Accessory cardiac pathway                       | Arrythmia     |
| 10068180       | Atrioventricular conduction time shortened      | Arrythmia     |
| 10068627       | Chronotropic incompetence                       | Arrythmia     |
| 10069571       | Atrioventricular dissociation                   | Arrythmia     |
| 10065342       | Supraventricular tachyarrhythmia                | Arrythmia     |
| 10065341       | Ventricular tachyarrhythmia                     | Arrythmia     |
| 10071710       | Lenegre's disease                               | Arrythmia     |
| 10064191       | Atrial conduction time prolongation             | Arrythmia     |
| 10074636       | Foetal heart rate deceleration abnormality      | Arrythmia     |
| 10074638       | Baseline foetal heart rate variability disorder | Arrythmia     |
| 10074640       | Junctional ectopic tachycardia                  | Arrythmia     |
| 10074641       | Nonreassuring foetal heart rate pattern         | Arrythmia     |
| 10074642       | Foetal heart rate acceleration abnormality      | Arrythmia     |
| 10074643       | Sinusoidal foetal heart rate pattern            | Arrythmia     |
| 10024899       | Low cardiac output syndrome                     | Heart failure |
| 10050510       | Ventricular hypokinesia                         | Heart failure |
| 10034498       | Pericarditis uraemic                            | Heart failure |
| 10051093       | Cardiopulmonary failure                         | Heart failure |
| 10034484       | Pericarditis                                    | Heart failure |
| 10051448       | Hepatojugular reflux                            | Heart failure |
| 10034474       | Pericardial effusion                            | Heart failure |
| 10051730       | Pericardial cyst                                | Heart failure |
| 10013002       | Dilatation atrial                               | Heart failure |
| 10052337       | Diastolic dysfunction                           | Heart failure |
| 10070909       | Metabolic cardiomyopathy                        | Heart failure |
| 10071436       | Systolic dysfunction                            | Heart failure |
| 10056370       | Congestive cardiomyopathy                       | Heart failure |
| 10024119       | Left ventricular failure                        | Heart failure |

| <b>PT code</b> | <b>Comorbidities</b>              | <b>Group</b>  |
|----------------|-----------------------------------|---------------|
| 10018723       | Grey syndrome neonatal            | Heart failure |
| 10069140       | Myocardial depression             | Heart failure |
| 10013012       | Dilatation ventricular            | Heart failure |
| 10027727       | Mitral valve incompetence         | Heart failure |
| 10049759       | Pericardial rub                   | Heart failure |
| 10048377       | Cardiomyopathy acute              | Heart failure |
| 10063083       | Chronic left ventricular failure  | Heart failure |
| 10047295       | Ventricular hypertrophy           | Heart failure |
| 10063082       | Acute right ventricular failure   | Heart failure |
| 10063081       | Acute left ventricular failure    | Heart failure |
| 10068230       | Cardiorenal syndrome              | Heart failure |
| 10066286       | Stress cardiomyopathy             | Heart failure |
| 10038748       | Restrictive cardiomyopathy        | Heart failure |
| 10049694       | Left ventricular dysfunction      | Heart failure |
| 10039163       | Right ventricular failure         | Heart failure |
| 10063084       | Chronic right ventricular failure | Heart failure |
| 10049773       | Left ventricular hypertrophy      | Heart failure |
| 10049780       | Neonatal cardiac failure          | Heart failure |
| 10049813       | Non-obstructive cardiomyopathy    | Heart failure |
| 10049874       | Cardio-respiratory distress       | Heart failure |
| 10050111       | Cardiomyopathy neonatal           | Heart failure |
| 10001029       | Acute pulmonary oedema            | Heart failure |
| 10023508       | Kyphoscoliotic heart disease      | Heart failure |
| 10049633       | Shoshin beriberi                  | Heart failure |
| 10007559       | Cardiac failure congestive        | Heart failure |
| 10059361       | Pleuropericarditis                | Heart failure |
| 10010969       | Cor pulmonale acute               | Heart failure |
| 10059056       | Ventricular dysfunction           | Heart failure |

| <b>PT code</b> | <b>Comorbidities</b>               | <b>Group</b>  |
|----------------|------------------------------------|---------------|
| 10010970       | Cor pulmonale chronic              | Heart failure |
| 10007637       | Cardiomyopathy alcoholic           | Heart failure |
| 10007636       | Cardiomyopathy                     | Heart failure |
| 10007632       | Cardiomegaly                       | Heart failure |
| 10007625       | Cardiogenic shock                  | Heart failure |
| 10060953       | Ventricular failure                | Heart failure |
| 10007572       | Cardiac hypertrophy                | Heart failure |
| 10012647       | Diabetic cardiomyopathy            | Heart failure |
| 10007560       | Cardiac failure high output        | Heart failure |
| 10010968       | Cor pulmonale                      | Heart failure |
| 10061024       | Cardiac disorder                   | Heart failure |
| 10074269       | Tachycardia induced cardiomyopathy | Heart failure |
| 10007558       | Cardiac failure chronic            | Heart failure |
| 10007556       | Cardiac failure acute              | Heart failure |
| 10007554       | Cardiac failure                    | Heart failure |
| 10007522       | Cardiac asthma                     | Heart failure |
| 10007509       | Cardiac amyloidosis                | Heart failure |
| 10075043       | Thyrotoxic cardiomyopathy          | Heart failure |
| 10011837       | Cytotoxic cardiomyopathy           | Heart failure |
| 10000358       | Accelerated hypertension           | Hypertension  |
| 10074301       | Right ventricular hypertension     | Hypertension  |
| 10038562       | Renovascular hypertension          | Hypertension  |
| 10020823       | Hypertensive heart disease         | Hypertension  |
| 10067598       | Neurogenic hypertension            | Hypertension  |
| 10049781       | Hypertension neonatal              | Hypertension  |
| 10049079       | Labile hypertension                | Hypertension  |
| 10042957       | Systolic hypertension              | Hypertension  |
| 10065508       | Orthostatic hypertension           | Hypertension  |

| <b>PT code</b> | <b>Comorbidities</b>                   | <b>Group</b>           |
|----------------|----------------------------------------|------------------------|
| 10048007       | Withdrawal hypertension                | Hypertension           |
| 10065918       | Prehypertension                        | Hypertension           |
| 10039834       | Secondary hypertension                 | Hypertension           |
| 10025600       | Malignant hypertension                 | Hypertension           |
| 10020801       | Hypertensive cardiomegaly              | Hypertension           |
| 10020802       | Hypertensive crisis                    | Hypertension           |
| 10059238       | Hypertensive angiopathy                | Hypertension           |
| 10058179       | Hypertensive emergency                 | Hypertension           |
| 10020772       | Hypertension                           | Hypertension           |
| 10058222       | Hypertensive cardiomyopathy            | Hypertension           |
| 10025603       | Malignant hypertensive heart disease   | Hypertension           |
| 10015488       | Essential hypertension                 | Hypertension           |
| 10026924       | Maternal hypertension affecting foetus | Hypertension           |
| 10012758       | Diastolic hypertension                 | Hypertension           |
| 10057615       | Endocrine hypertension                 | Hypertension           |
| 10011105       | Coronary ostial stenosis               | Coronary heart disease |
| 10011089       | Coronary artery stenosis               | Coronary heart disease |
| 10013428       | Dissecting coronary artery aneurysm    | Coronary heart disease |
| 10002388       | Angina unstable                        | Coronary heart disease |
| 10068534       | Coronary no-reflow phenomenon          | Coronary heart disease |
| 10003211       | Arteriosclerosis coronary artery       | Coronary heart disease |
| 10048631       | Coronary artery dissection             | Coronary heart disease |
| 10011091       | Coronary artery thrombosis             | Coronary heart disease |
| 10003225       | Arteriospasm coronary                  | Coronary heart disease |
| 10072685       | Microvascular coronary artery disease  | Coronary heart disease |
| 10036759       | Prinzmetal angina                      | Coronary heart disease |
| 10003232       | Arteritis coronary                     | Coronary heart disease |
| 10069167       | Kounis syndrome                        | Coronary heart disease |

| <b>PT code</b> | <b>Comorbidities</b>               | <b>Group</b>           |
|----------------|------------------------------------|------------------------|
| 10002383       | Angina pectoris                    | Coronary heart disease |
| 10011086       | Coronary artery occlusion          | Coronary heart disease |
| 10011084       | Coronary artery embolism           | Coronary heart disease |
| 10072186       | Myocardial stunning                | Coronary heart disease |
| 10011078       | Coronary artery disease            | Coronary heart disease |
| 10028596       | Myocardial infarction              | Coronary heart disease |
| 10011071       | Coronary artery aneurysm           | Coronary heart disease |
| 10028600       | Myocardial ischaemia               | Coronary heart disease |
| 10033697       | Papillary muscle infarction        | Coronary heart disease |
| 10000891       | Acute myocardial infarction        | Coronary heart disease |
| 10048858       | Ischaemic cardiomyopathy           | Coronary heart disease |
| 10051624       | Myocardial reperfusion injury      | Coronary heart disease |
| 10065420       | Coronary artery dilatation         | Coronary heart disease |
| 10052895       | Coronary artery insufficiency      | Coronary heart disease |
| 10064994       | Subclavian coronary steal syndrome | Coronary heart disease |
| 10051592       | Acute coronary syndrome            | Coronary heart disease |
| 10049768       | Silent myocardial infarction       | Coronary heart disease |
| 10059611       | Coronary artery perforation        | Coronary heart disease |
| 10058144       | Postinfarction angina              | Coronary heart disease |
| 10061216       | Infarction                         | Coronary heart disease |
| 10058145       | Subendocardial ischaemia           | Coronary heart disease |
| 10055803       | Haemorrhage coronary artery        | Coronary heart disease |
| 10063900       | Steal syndrome                     | Vascular disease       |
| 10012978       | Diffuse vasculitis                 | Vascular disease       |
| 10057521       | Peripheral artery aneurysm         | Vascular disease       |
| 10011703       | Cyanosis                           | Vascular disease       |
| 10057520       | Peripheral artery dissection       | Vascular disease       |
| 10064601       | Iliac artery occlusion             | Vascular disease       |



| <b>PT code</b> | <b>Comorbidities</b>      | <b>Group</b>     |
|----------------|---------------------------|------------------|
| 10015867       | Extravasation blood       | Vascular disease |
| 10059245       | Angiopathy                | Vascular disease |
| 10059385       | Extremity necrosis        | Vascular disease |
| 10011474       | Cryoglobulinaemia         | Vascular disease |
| 10055798       | Haemorrhage               | Vascular disease |
| 10052076       | Haemodynamic instability  | Vascular disease |
| 10025282       | Lymphoedema               | Vascular disease |
| 10054044       | Diabetic microangiopathy  | Vascular disease |
| 10054208       | Aortic calcification      | Vascular disease |
| 10022562       | Intermittent claudication | Vascular disease |
| 10048671       | Venous stenosis           | Vascular disease |
| 10021097       | Hypotension               | Vascular disease |
| 10057453       | Aortic dilatation         | Vascular disease |
| 10018852       | Haematoma                 | Vascular disease |
| 10071573       | Susac's syndrome          | Vascular disease |
| 10016427       | Femoral artery aneurysm   | Vascular disease |
| 10056717       | Varicophlebitis           | Vascular disease |
| 10009192       | Circulatory collapse      | Vascular disease |
| 10014522       | Embolism venous           | Vascular disease |
| 10021138       | Hypovolaemic shock        | Vascular disease |
| 10002482       | Angiosclerosis            | Vascular disease |
| 10060963       | Arterial disorder         | Vascular disease |
| 10062174       | Venous aneurysm           | Vascular disease |
| 10002910       | Aortic thrombosis         | Vascular disease |
| 10002906       | Aortic stenosis           | Vascular disease |
| 10002895       | Aortic dissection         | Vascular disease |
| 10002886       | Aortic aneurysm rupture   | Vascular disease |
| 10003178       | Arterial thrombosis       | Vascular disease |

| <b>PT code</b> | <b>Comorbidities</b>                  | <b>Group</b>     |
|----------------|---------------------------------------|------------------|
| 10062198       | Microangiopathy                       | Vascular disease |
| 10003210       | Arteriosclerosis                      | Vascular disease |
| 10062585       | Peripheral arterial occlusive disease | Vascular disease |
| 10062599       | Arterial occlusive disease            | Vascular disease |
| 10002331       | Aneurysm arteriovenous                | Vascular disease |
| 10002329       | Aneurysm                              | Vascular disease |
| 10075049       | Peripheral venous disease             | Vascular disease |
| 10062610       | Ischaemic limb pain                   | Vascular disease |
| 10002882       | Aortic aneurysm                       | Vascular disease |
| 10061255       | Ischaemia                             | Vascular disease |
| 10060964       | Arterial haemorrhage                  | Vascular disease |
| 10060965       | Arterial stenosis                     | Vascular disease |
| 10063547       | Diabetic macroangiopathy              | Vascular disease |
| 10061169       | Embolism                              | Vascular disease |
| 10072563       | Peripheral artery stenosis            | Vascular disease |
| 10072564       | Peripheral artery thrombosis          | Vascular disease |
| 10061815       | Diabetic vascular disorder            | Vascular disease |
| 10072579       | Granulomatosis with polyangiitis      | Vascular disease |
| 10052019       | Femoral artery occlusion              | Vascular disease |
| 10004213       | Behcet's syndrome                     | Vascular disease |
| 10003880       | Axillary vein thrombosis              | Vascular disease |
| 10061340       | Peripheral embolism                   | Vascular disease |
| 10061408       | Venous thrombosis limb                | Vascular disease |
| 10063344       | Microscopic polyangiitis              | Vascular disease |
| 10061636       | Angiodysplasia                        | Vascular disease |
| 10007513       | Cardiac aneurysm                      | Vascular disease |
| 10047115       | Vasculitis                            | Vascular disease |
| 10047249       | Venous thrombosis                     | Vascular disease |

| <b>PT code</b> | <b>Comorbidities</b>           | <b>Group</b>            |
|----------------|--------------------------------|-------------------------|
| 10065558       | Aortic arteriosclerosis        | Vascular disease        |
| 10049446       | Subclavian vein thrombosis     | Vascular disease        |
| 10034879       | Phlebitis                      | Vascular disease        |
| 10047124       | Vasculitis necrotising         | Vascular disease        |
| 10036155       | Poor peripheral circulation    | Vascular disease        |
| 10042334       | Subclavian artery thrombosis   | Vascular disease        |
| 10050180       | Subclavian artery stenosis     | Vascular disease        |
| 10037912       | Raynaud's phenomenon           | Vascular disease        |
| 10034636       | Peripheral vascular disorder   | Vascular disease        |
| 10046996       | Varicose vein                  | Vascular disease        |
| 10043570       | Thrombophlebitis               | Vascular disease        |
| 10042331       | Subclavian artery aneurysm     | Vascular disease        |
| 10043595       | Thrombophlebitis superficial   | Vascular disease        |
| 10043607       | Thrombosis                     | Vascular disease        |
| 10069695       | Subclavian artery occlusion    | Vascular disease        |
| 10049771       | Shock haemorrhagic             | Vascular disease        |
| 10049927       | Dry gangrene                   | Vascular disease        |
| 10051055       | Deep vein thrombosis           | Vascular disease        |
| 10051753       | Vascular calcification         | Vascular disease        |
| 10034567       | Peripheral circulatory failure | Vascular disease        |
| 10048591       | Post thrombotic syndrome       | Vascular disease        |
| 10048974       | Cardiac pseudoaneurysm         | Vascular disease        |
| 10048380       | Aneurysm ruptured              | Vascular disease        |
| 10034576       | Peripheral ischaemia           | Vascular disease        |
| 10031127       | Orthostatic hypotension        | Vascular disease        |
| 10047141       | Vasodilatation                 | Vascular disease        |
| 10059613       | Stroke in evolution            | Cerebrovascular disease |
| 10007686       | Carotid artery aneurysm        | Cerebrovascular disease |

| <b>PT code</b> | <b>Comorbidities</b>               | <b>Group</b>            |
|----------------|------------------------------------|-------------------------|
| 10073230       | Brain stem haematoma               | Cerebrovascular disease |
| 10044390       | Transient ischaemic attack         | Cerebrovascular disease |
| 10049440       | Spinal artery embolism             | Cerebrovascular disease |
| 10043647       | Thrombotic stroke                  | Cerebrovascular disease |
| 10007684       | Carotid arterial embolus           | Cerebrovascular disease |
| 10042365       | Subdural haemorrhage neonatal      | Cerebrovascular disease |
| 10060839       | Embolic cerebral infarction        | Cerebrovascular disease |
| 10072043       | Central nervous system haemorrhage | Cerebrovascular disease |
| 10060840       | Ischaemic cerebral infarction      | Cerebrovascular disease |
| 10069020       | Basal ganglia infarction           | Cerebrovascular disease |
| 10068644       | Brain stem stroke                  | Cerebrovascular disease |
| 10065559       | Cerebral arteriosclerosis          | Cerebrovascular disease |
| 10061038       | Cerebellar haematoma               | Cerebrovascular disease |
| 10068621       | Cerebellar ischaemia               | Cerebrovascular disease |
| 10059491       | Intracranial haematoma             | Cerebrovascular disease |
| 10067744       | Capsular warning syndrome          | Cerebrovascular disease |
| 10063093       | Basilar artery thrombosis          | Cerebrovascular disease |
| 10048963       | Basilar artery occlusion           | Cerebrovascular disease |
| 10075394       | Cerebral aneurysm perforation      | Cerebrovascular disease |
| 10067057       | Basal ganglia haemorrhage          | Cerebrovascular disease |
| 10048964       | Carotid artery occlusion           | Cerebrovascular disease |
| 10067116       | Carotid arteriosclerosis           | Cerebrovascular disease |
| 10047330       | Vertebral artery stenosis          | Cerebrovascular disease |
| 10048965       | Vertebral artery occlusion         | Cerebrovascular disease |
| 10067277       | Cerebral microhaemorrhage          | Cerebrovascular disease |
| 10067347       | Thrombotic cerebral infarction     | Cerebrovascular disease |
| 10049236       | Spinal epidural haemorrhage        | Cerebrovascular disease |
| 10074717       | Precerebral artery thrombosis      | Cerebrovascular disease |

| <b>PT code</b> | <b>Comorbidities</b>             | <b>Group</b>            |
|----------------|----------------------------------|-------------------------|
| 10073563       | Spinal subdural haemorrhage      | Cerebrovascular disease |
| 10061744       | Carotid artery disease           | Cerebrovascular disease |
| 10047119       | Vasculitis cerebral              | Cerebrovascular disease |
| 10061256       | Ischaemic stroke                 | Cerebrovascular disease |
| 10008088       | Cerebral artery embolism         | Cerebrovascular disease |
| 10073945       | Perinatal stroke                 | Cerebrovascular disease |
| 10007687       | Carotid artery stenosis          | Cerebrovascular disease |
| 10004163       | Basilar artery stenosis          | Cerebrovascular disease |
| 10073565       | Intracranial artery dissection   | Cerebrovascular disease |
| 10073564       | Spinal subarachnoid haemorrhage  | Cerebrovascular disease |
| 10006145       | Brain stem haemorrhage           | Cerebrovascular disease |
| 10006147       | Brain stem infarction            | Cerebrovascular disease |
| 10048992       | Spinal cord haemorrhage          | Cerebrovascular disease |
| 10051078       | Lacunar infarction               | Cerebrovascular disease |
| 10050164       | Spinal subdural haematoma        | Cerebrovascular disease |
| 10039330       | Ruptured cerebral aneurysm       | Cerebrovascular disease |
| 10007688       | Carotid artery thrombosis        | Cerebrovascular disease |
| 10042316       | Subarachnoid haemorrhage         | Cerebrovascular disease |
| 10008030       | Cerebellar haemorrhage           | Cerebrovascular disease |
| 10036511       | Precerebral artery occlusion     | Cerebrovascular disease |
| 10056237       | Migrainous infarction            | Cerebrovascular disease |
| 10018985       | Haemorrhage intracranial         | Cerebrovascular disease |
| 10019005       | Haemorrhagic cerebral infarction | Cerebrovascular disease |
| 10019016       | Haemorrhagic stroke              | Cerebrovascular disease |
| 10057777       | Vertebral artery thrombosis      | Cerebrovascular disease |
| 10054749       | Charcot-Bouchard microaneurysms  | Cerebrovascular disease |
| 10071043       | Basal ganglia stroke             | Cerebrovascular disease |
| 10051328       | Carotid aneurysm rupture         | Cerebrovascular disease |

| <b>PT code</b> | <b>Comorbidities</b>                  | <b>Group</b>            |
|----------------|---------------------------------------|-------------------------|
| 10022758       | Intracranial aneurysm                 | Cerebrovascular disease |
| 10022840       | Intraventricular haemorrhage          | Cerebrovascular disease |
| 10022841       | Intraventricular haemorrhage neonatal | Cerebrovascular disease |
| 10023237       | Jugular vein thrombosis               | Cerebrovascular disease |
| 10071205       | Brain stem microhaemorrhage           | Cerebrovascular disease |
| 10053942       | Cerebral haematoma                    | Cerebrovascular disease |
| 10053633       | Cerebellar artery occlusion           | Cerebrovascular disease |
| 10071206       | Cerebellar microhaemorrhage           | Cerebrovascular disease |
| 10071316       | Spinal artery thrombosis              | Cerebrovascular disease |
| 10071355       | Internal carotid artery kinking       | Cerebrovascular disease |
| 10055677       | Haemorrhagic transformation stroke    | Cerebrovascular disease |
| 10063648       | Cerebral artery stenosis              | Cerebrovascular disease |
| 10008120       | Cerebral ischaemia                    | Cerebrovascular disease |
| 10008132       | Cerebral thrombosis                   | Cerebrovascular disease |
| 10008118       | Cerebral infarction                   | Cerebrovascular disease |
| 10008112       | Cerebral haemorrhage neonatal         | Cerebrovascular disease |
| 10008111       | Cerebral haemorrhage                  | Cerebrovascular disease |
| 10050403       | Carotid artery dissection             | Cerebrovascular disease |
| 10050162       | Spinal epidural haematoma             | Cerebrovascular disease |
| 10008092       | Cerebral artery thrombosis            | Cerebrovascular disease |
| 10008190       | Cerebrovascular accident              | Cerebrovascular disease |
| 10008196       | Cerebrovascular disorder              | Cerebrovascular disease |
| 10008119       | Cerebral infarction foetal            | Cerebrovascular disease |
| 10042317       | Subarachnoid haemorrhage neonatal     | Cerebrovascular disease |
| 10008138       | Cerebral venous thrombosis            | Cerebrovascular disease |
| 10008089       | Cerebral artery occlusion             | Cerebrovascular disease |
| 10008034       | Cerebellar infarction                 | Cerebrovascular disease |
| 10014498       | Embolic stroke                        | Cerebrovascular disease |

| <b>PT code</b> | <b>Comorbidities</b>          | <b>Group</b>            |
|----------------|-------------------------------|-------------------------|
| 10058940       | Putamen haemorrhage           | Cerebrovascular disease |
| 10058939       | Thalamus haemorrhage          | Cerebrovascular disease |
| 10058842       | Cerebrovascular insufficiency | Cerebrovascular disease |
| 10008023       | Cerebellar artery thrombosis  | Cerebrovascular disease |
| 10063661       | Vascular encephalopathy       | Cerebrovascular disease |
| 10064961       | Thalamic infarction           | Cerebrovascular disease |
| 10050157       | Cerebral haemorrhage foetal   | Cerebrovascular disease |
| 10071716       | Vertebral artery dissection   | Cerebrovascular disease |
| 10027733       | Mitral valve stenosis         | Valvular heart disease  |
| 10051538       | Mitral valve sclerosis        | Valvular heart disease  |
| 10027730       | Mitral valve prolapse         | Valvular heart disease  |
| 10002912       | Aortic valve disease mixed    | Valvular heart disease  |
| 10002915       | Aortic valve incompetence     | Valvular heart disease  |
| 10002917       | Aortic valve sclerosis        | Valvular heart disease  |
| 10066862       | Tricuspid valve prolapse      | Valvular heart disease  |
| 10061082       | Cardiac valve sclerosis       | Valvular heart disease  |
| 10061589       | Aortic valve disease          | Valvular heart disease  |
| 10061532       | Mitral valve disease          | Valvular heart disease  |
| 10050559       | Aortic valve calcification    | Valvular heart disease  |
| 10061406       | Cardiac valve disease         | Valvular heart disease  |
| 10057466       | Tricuspid valve calcification | Valvular heart disease  |
| 10044640       | Tricuspid valve incompetence  | Valvular heart disease  |
| 10002918       | Aortic valve stenosis         | Valvular heart disease  |

**Online Resource 2.** List of MedDRA Preferred Term (PT) codes used to define safety outcomes.

| <b>PT code</b> | <b>Adverse event</b>                   | <b>Group</b>                          |
|----------------|----------------------------------------|---------------------------------------|
| 10008190       | Cerebrovascular accident               | Cerebral accident                     |
| 10044390       | Transient ischaemic attack             | Cerebral accident                     |
| 10061256       | Ischaemicstroke                        | Cerebral accident                     |
| 10014498       | Embolicstroke                          | Cerebral accident                     |
| 10008120       | Cerebralischaemia                      | Cerebral accident                     |
| 10008111       | Cerebralhaemorrhage                    | Cerebral accident                     |
| 10063661       | Vascularencephalopathy                 | Cerebral accident                     |
| 10067967       | Brain injury                           | Cerebral accident                     |
| 10070976       | Craniocerebralinjury                   | Cerebral accident                     |
| 10068621       | Cerebellarischaemia                    | Cerebral accident                     |
| 10047119       | Vasculitiscerebral                     | Cerebral accident                     |
| 10003662       | Atrialflutter                          | Arrhythmia                            |
| 10003671       | Atrioventricularblock                  | Arrhythmia                            |
| 10003674       | Atrioventricularblock first degree     | Arrhythmia                            |
| 10003658       | Atrialfibrillation                     | Arrhythmia                            |
| 10003677       | Atrioventricularblockseconddegree      | Arrhythmia                            |
| 10049447       | Tachyarrhythmia                        | Arrhythmia                            |
| 10042602       | Supraventricularextrasystoles          | Arrhythmia                            |
| 10057281       | Medicaldevicecomplication              | Vascular complications of the fistula |
| 10063829       | Device malfunction                     | Vascular complications of the fistula |
| 10051099       | Catheter site haemorrhage              | Vascular complications of the fistula |
| 10058562       | Arteriovenous fistula occlusion        | Vascular complications of the fistula |
| 10003192       | Arteriovenous fistula thrombosis       | Vascular complications of the fistula |
| 10055123       | Arteriovenous fistula site haemorrhage | Vascular complications of the fistula |



| <b>PT code</b> | <b>Adverse event</b>                    | <b>Group</b>                          |
|----------------|-----------------------------------------|---------------------------------------|
| 10055122       | Arteriovenous fistula site complication | Vascular complications of the fistula |
| 10064775       | Arteriovenousgraftaneurysm              | Vascular complications of the fistula |
| 10066916       | Arteriovenous fistula aneurysm          | Vascular complications of the fistula |
| 10055150       | Arteriovenous fistula site haematoma    | Vascular complications of the fistula |
| 10075211       | Myocardialnecrosis marker increased     | Coronary disease                      |
| 10028596       | Myocardialinfarction                    | Coronary disease                      |
| 10051592       | Acute coronarysyndrome                  | Coronary disease                      |
| 10002388       | Angina unstable                         | Coronary disease                      |
| 10028600       | Myocardialischaemia                     | Coronary disease                      |
| 10011086       | Coronaryarteryocclusion                 | Coronary disease                      |
| 10011078       | Coronaryarterydisease                   | Coronary disease                      |
| 10002383       | Angina pectoris                         | Coronary disease                      |
| 10000891       | Acute myocardialinfarction              | Coronary disease                      |
| 10027514       | Metrorrhagia                            | Bleeding                              |
| 10027295       | Menometrorrhagia                        | Bleeding                              |
| 10018829       | Haemarthrosis                           | Bleeding                              |
| 10027141       | Melaena                                 | Bleeding                              |
| 10018852       | Haematoma                               | Bleeding                              |
| 10018964       | Haemoptysis                             | Bleeding                              |
| 10052293       | Haemorrhagicanaemia                     | Bleeding                              |
| 10017955       | Gastrointestinalhaemorrhage             | Bleeding                              |
| 10049771       | Shock haemorrhagic                      | Bleeding                              |
| 10018867       | Haematuria                              | Bleeding                              |
| 10014009       | Earhaemorrhage                          | Bleeding                              |
| 10017788       | Gastrichaemorrhage                      | Bleeding                              |
| 10055798       | Haemorrhage                             | Bleeding                              |

| <b>PT code</b> | <b>Adverse event</b>                      | <b>Group</b>    |
|----------------|-------------------------------------------|-----------------|
| 10038081       | Rectalulcerhaemorrhage                    | Bleeding        |
| 10038063       | Rectalhaemorrhage                         | Bleeding        |
| 10015867       | Extravasationblood                        | Bleeding        |
| 10038867       | Retinalhaemorrhage                        | Bleeding        |
| 10059175       | Intestinalhaemorrhage                     | Bleeding        |
| 10017929       | Gastrointestinalangiodyplasiahaemorrhagic | Bleeding        |
| 10015090       | Epistaxis                                 | Bleeding        |
| 10011793       | Cystitishaemorrhagic                      | Bleeding        |
| 10060964       | Arterialhaemorrhage                       | Bleeding        |
| 10010719       | Conjunctivalhaemorrhage                   | Bleeding        |
| 10061387       | Traumaticintracranialhaemorrhage          | Bleeding        |
| 10031253       | Osteomyelitis acute                       | OtherInfections |
| 10031252       | Osteomyelitis                             | OtherInfections |
| 10031064       | Orchitis                                  | OtherInfections |
| 10031149       | Osteitis                                  | OtherInfections |
| 10030963       | Oralcandidiasis                           | OtherInfections |
| 10027082       | Mediastinitis                             | OtherInfections |
| 10024641       | Listeriosis                               | OtherInfections |
| 10021789       | Infection                                 | OtherInfections |
| 10019974       | Herpes zoster                             | OtherInfections |
| 10017533       | Fungalinfection                           | OtherInfections |
| 10015145       | Erysipelas                                | OtherInfections |
| 10011831       | Cytomegalovirusinfection                  | OtherInfections |
| 10011781       | Cystitis                                  | OtherInfections |
| 10007882       | Cellulitis                                | OtherInfections |
| 10004142       | Bartholinitis                             | OtherInfections |
| 10003256       | Arthritisgonococcal                       | OtherInfections |
| 10017711       | Gangrene                                  | OtherInfections |

| <b>PT code</b> | <b>Adverse event</b>                 | <b>Group</b>        |
|----------------|--------------------------------------|---------------------|
| 10061126       | Escherichia infection                | OtherInfections     |
| 10054138       | Stenotrophomonasinfection            | OtherInfections     |
| 10051910       | Enterobacterinfection                | OtherInfections     |
| 10054236       | Clostridium difficile infection      | OtherInfections     |
| 10059442       | Woundinfectionstaphylococcal         | OtherInfections     |
| 10060803       | Diabeticfootinfection                | OtherInfections     |
| 10060945       | Bacterialinfection                   | OtherInfections     |
| 10047461       | Viralinfection                       | OtherInfections     |
| 10053555       | Arthritisbacterial                   | OtherInfections     |
| 10061124       | Enterococcalinfection                | OtherInfections     |
| 10058080       | Staphylococcalinfection              | OtherInfections     |
| 10061259       | Klebsiellainfection                  | OtherInfections     |
| 10061324       | Oralfungalinfection                  | OtherInfections     |
| 10042868       | Synovitis                            | OtherInfections     |
| 10061470       | Proteusinfection                     | OtherInfections     |
| 10061471       | Pseudomonasinfection                 | OtherInfections     |
| 10064250       | Staphylococcalosteomyelitis          | OtherInfections     |
| 10064687       | Device relatedinfection              | OtherInfections     |
| 10070963       | Infectiveglossitis                   | OtherInfections     |
| 10074171       | Aspergillusinfection                 | OtherInfections     |
| 10046571       | Urinarytractinfection                | OtherInfections     |
| 10057688       | Catheter site discharge              | Localizedinfections |
| 10056520       | Catheter site infection              | Localizedinfections |
| 10055124       | Arteriovenous fistula site infection | Localizedinfections |
| 10072136       | Catheter site abscess                | Localizedinfections |
| 10024774       | Localisedinfection                   | Localizedinfections |
| 10001029       | Acute pulmonaryoedema                | Heartfailure        |
| 10037423       | Pulmonaryoedema                      | Heartfailure        |
| 10007625       | Cardiogenic shock                    | Heartfailure        |

| <b>PT code</b> | <b>Adverse event</b>                 | <b>Group</b>           |
|----------------|--------------------------------------|------------------------|
| 10007559       | Cardiacfailure congestive            | Heartfailure           |
| 10007554       | Cardiacfailure                       | Heartfailure           |
| 10048671       | Venousstenosis                       | Peripheral ischemia    |
| 10034576       | Peripheralischaemia                  | Peripheral ischemia    |
| 10062585       | Peripheralarterial occlusive disease | Peripheral ischemia    |
| 10049927       | Dry gangrene                         | Peripheral ischemia    |
| 10022562       | Intermittentclaudication             | Peripheral ischemia    |
| 10009033       | Chronicobstructivepulmonarydisease   | Respiratory infections |
| 10044314       | Tracheobronchitis                    | Respiratory infections |
| 10035699       | Pneumonia escherichia                | Respiratory infections |
| 10006451       | Bronchitis                           | Respiratory infections |
| 10035742       | Pneumonitis                          | Respiratory infections |
| 10073755       | Pneumocystisjirovecii pneumonia      | Respiratory infections |
| 10035664       | Pneumonia                            | Respiratory infections |
| 10044755       | Tuberculosis                         | Respiratory infections |
| 10046306       | Upperrespiratorytractinfection       | Respiratory infections |
| 10060946       | Pneumonia bacterial                  | Respiratory infections |
| 10061229       | Lunginfection                        | Respiratory infections |
| 10058879       | Serratiasepsis                       | Sepsis                 |
| 10053166       | Candida sepsis                       | Sepsis                 |
| 10054160       | Klebsiellasepsis                     | Sepsis                 |
| 10056430       | Staphylococalsepsis                  | Sepsis                 |
| 10069802       | Device relatedsepsis                 | Sepsis                 |
| 10040070       | Septic shock                         | Sepsis                 |
| 10058877       | Pseudomonalsepsis                    | Sepsis                 |
| 10048709       | Urosepsis                            | Sepsis                 |
| 10040047       | Sepsis                               | Sepsis                 |
| 10015296       | Escherichia sepsis                   | Sepsis                 |

| <b>PT code</b> | <b>Adverse event</b>       | <b>Group</b> |
|----------------|----------------------------|--------------|
| 10053840       | Bacterialesepsis           | Sepsis       |
| 10048988       | Renalarteryocclusion       | Thrombosis   |
| 10043607       | Thrombosis                 | Thrombosis   |
| 10038831       | Retinalarterythrombosis    | Thrombosis   |
| 10061408       | Venousthrombosislimb       | Thrombosis   |
| 10072564       | Peripheralarterythrombosis | Thrombosis   |
| 10003178       | Arterialthrombosis         | Thrombosis   |
| 10051055       | Deepveinthrombosis         | Thrombosis   |
| 10034879       | Phlebitis                  | Thrombosis   |
